# Supplementary material for: Imbalance of Th17/Tregs in rats with smoke inhalation-induced acute lung injury
Source: PubMed Central journal article supplement (PMC4756332; doi:10.1038/srep21348), 2016-02-17
Supplement: srep21348-s1.pdf [file srep21348-s1.pdf]

Imbalance of Th17/Tregs in rats with smoke inhalation-induced acute lung injury

Fan Zhang, Mian-yang Li, Ya-ting Lan, Cheng-bin Wang \*

Department of Clinical Laboratory Medicine, Chinese People's Liberation Army General Hospital

& Postgraduate Medical School, Beijing 100853, People's Republic of China

\* Correspondence should be addressed to C.-B.W. (email: wangcb301@126.com)

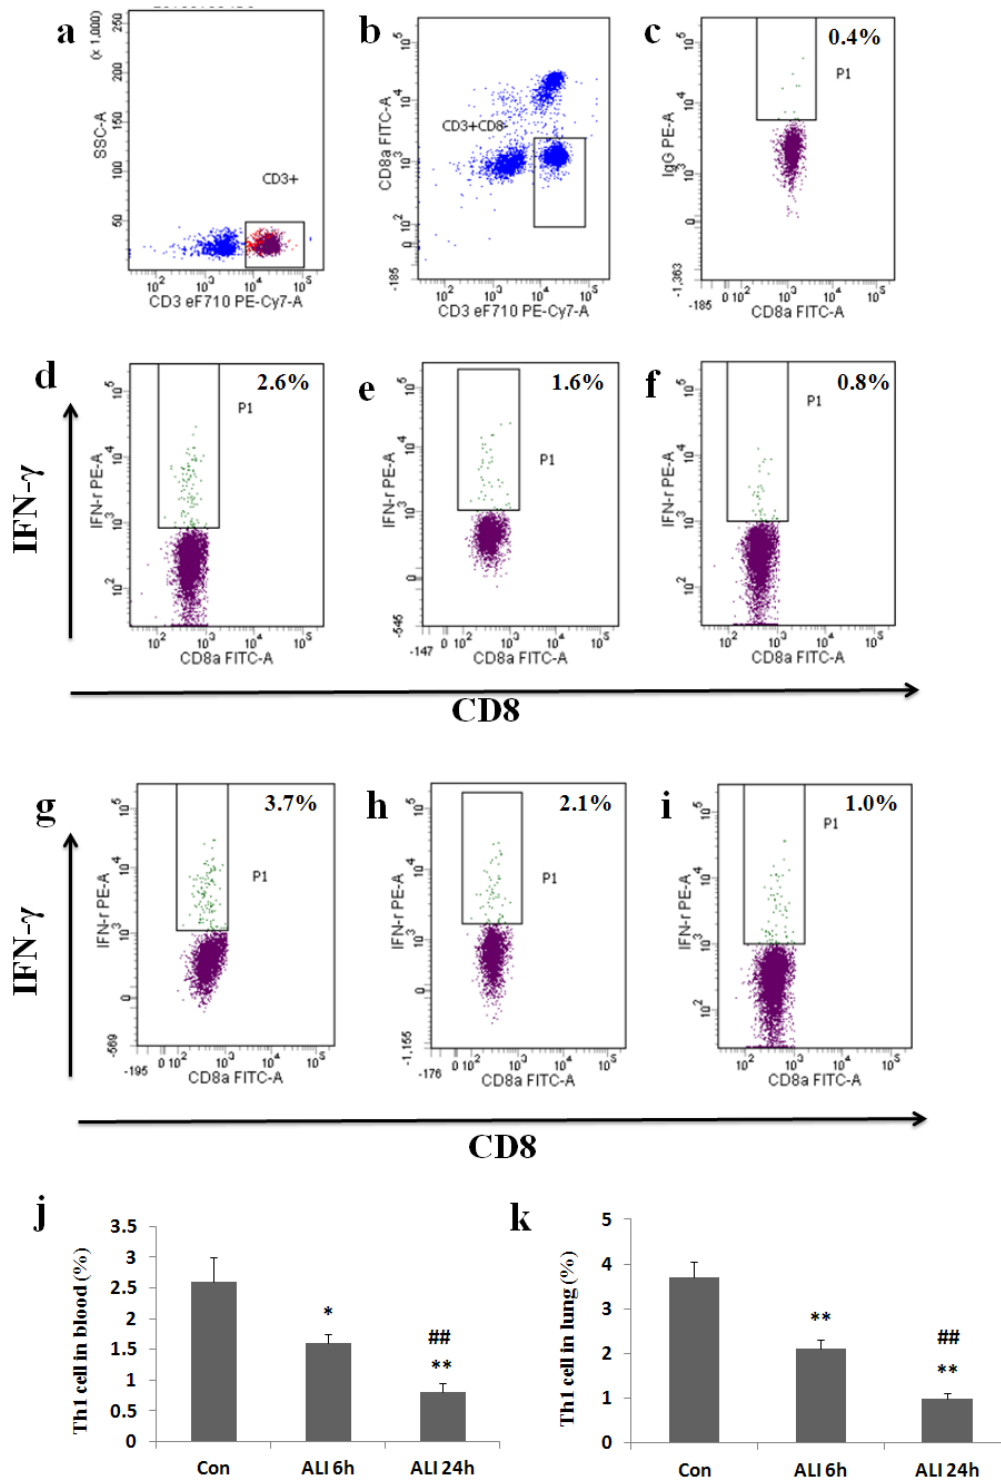

**Supplementary Fig. S1.** Th1 prevalence decreased in rats with smoke inhalation. Lymphocytes were stimulated with PMA, ionomycin and BFA for 5 h, and then stained with labeled antibodies as described in Materials and methods. **(a)** T lymphocytes were gated by flow cytometry; **(b)** CD4<sup>+</sup> T subsets were gated by flow cytometry; **(c)** Isotype control; **(d)** IFN- $\gamma$  expression in CD4<sup>+</sup>

T cells were gated by flow cytometry in Con group in peripheral blood; (e) IFN- $\gamma$  expression in CD4<sup>+</sup> T cells were gated by flow cytometry in ALI 6h group in peripheral blood; (f) IFN- $\gamma$  expression in CD4<sup>+</sup> T cells were gated by flow cytometry in ALI 24h group in peripheral blood; (g) IFN- $\gamma$  expression in CD4<sup>+</sup> T cells were gated by flow cytometry in Con group in lung; (h) IFN- $\gamma$  expression in CD4<sup>+</sup> T cells were gated by flow cytometry in ALI 6h group in lung; (i) IFN- $\gamma$  expression in CD4<sup>+</sup> T cells were gated by flow cytometry in ALI 24h group in lung; (j) The circulating Th1 cell frequency was presented as mean  $\pm$  S.E.M; (k) The Th1 cell frequency in lung was presented as mean  $\pm$  S.E.M. Con (normal control group, ambient air inhalation, n=10), ALI 6h (ALI group, smoke inhalation for 6h, n=10), ALI 24h (ALI group, smoke inhalation for 24h, n=10). \*P<0.05 and \*\*P<0.01 versus normal control group; #P<0.05 and ##P<0.01 versus ALI 6h group.

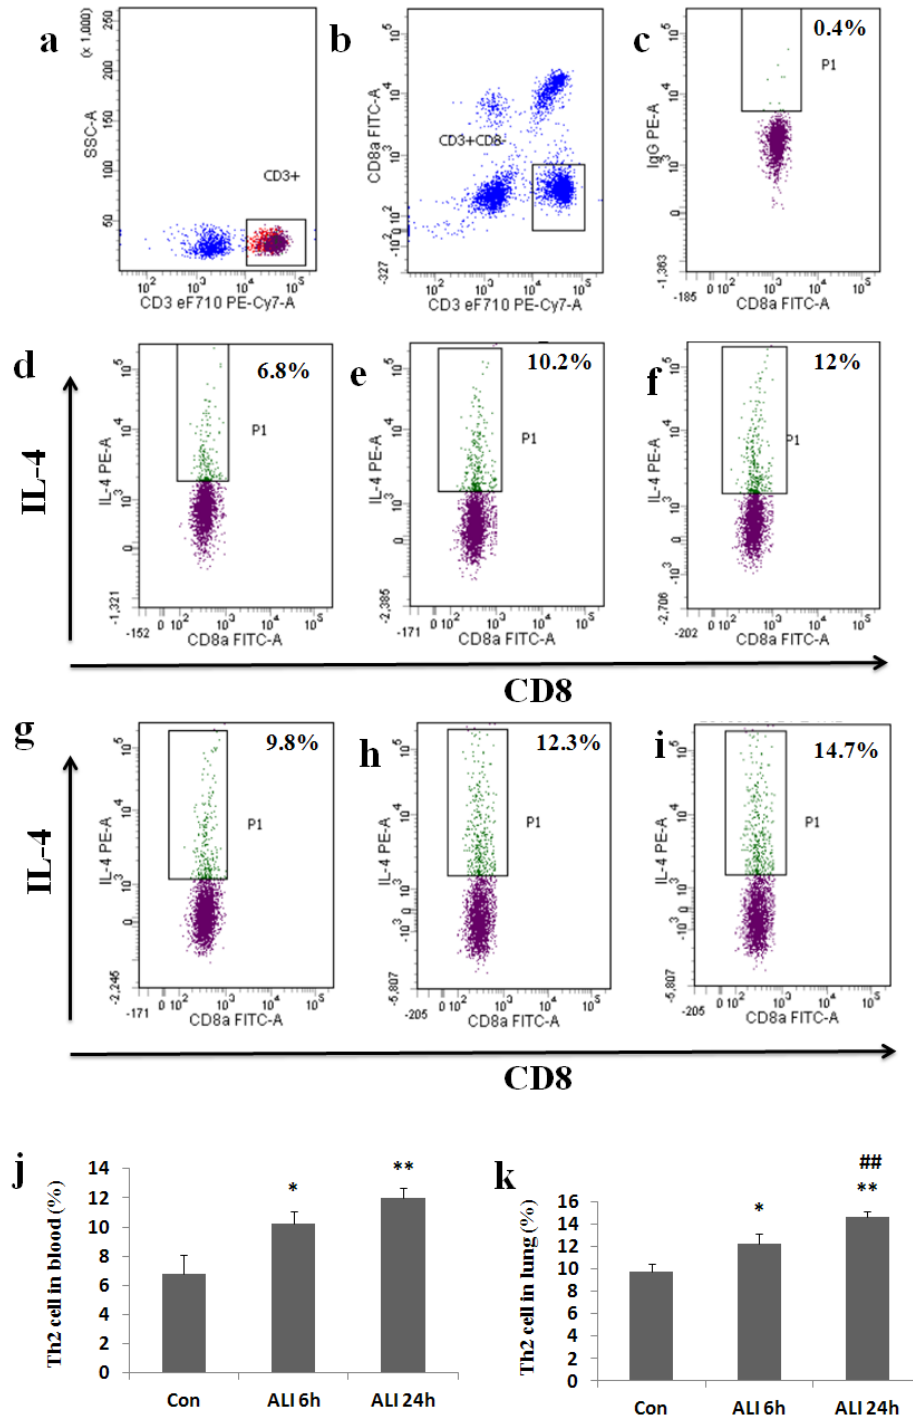

**Supplementary Fig. S2.** Th2 prevalence increased in rats with smoke inhalation. Lymphocytes were stimulated with PMA, ionomycin and BFA for 5 h, and then stained with labeled antibodies as described in Materials and methods. (a) T lymphocytes were gated by flow cytometry; (b) CD4<sup>+</sup> T subsets were gated by flow cytometry; (c) Isotype control; (d) IL-4 expression in CD4<sup>+</sup> T

cells were gated by flow cytometry in Con group in peripheral blood; (e) IL-4 expression in CD4<sup>+</sup> T cells were gated by flow cytometry in ALI 6h group in peripheral blood; (f) IL-4 expression in CD4<sup>+</sup> T cells were gated by flow cytometry in ALI 24h group in peripheral blood; (g) IL-4 expression in CD4<sup>+</sup> T cells were gated by flow cytometry in Con group in lung; (h) IL-4 expression in CD4<sup>+</sup> T cells were gated by flow cytometry in ALI 6h group in lung; (i) IL-4 expression in CD4<sup>+</sup> T cells were gated by flow cytometry in ALI 24h group in lung; (j) The circulating Th2 cell frequency was presented as mean  $\pm$ S.E.M; (k) The Th2 cell frequency in lung was presented as mean  $\pm$ S.E.M. Con (normal control group, ambient air inhalation, n=10), ALI 6h (ALI group, smoke inhalation for 6h, n=10), ALI 24h (ALI group, smoke inhalation for 24h, n=10). \*P<0.05 and \*\*P<0.01 versus normal control group; #P<0.05 and ##P<0.01 versus ALI 6h group.

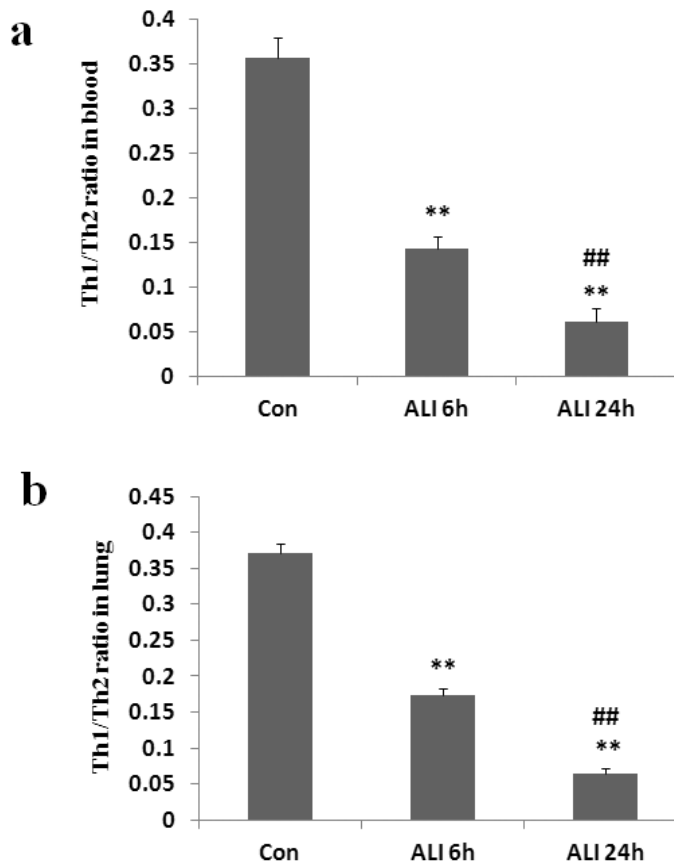

**Supplementary Fig. S3.** The ratio of Th1/Th2. There was a significant decrease in the ratio of Th1/Th2 in peripheral blood and lung from rats with smoke inhalation. **(a)** The ratio of Th1/Th2 in peripheral blood; **(b)** The ratio of Th1/Th2 in lung. Con (normal control group, ambient air inhalation, n=10), ALI 6h (ALI group, smoke inhalation for 6h, n=10), ALI 24h (ALI group, smoke inhalation for 24h, n=10); data are presented as mean  $\pm$  S.E.M. \*P<0.05 and \*\*P<0.01 versus normal control group; #P<0.05 and ##P<0.01 versus ALI 6h group.

**Supplementary Table S1.** Th1- and Th2-related cytokines in serum.

| Cytokines             | Con            | ALI 6h           | ALI 24h            |
|-----------------------|----------------|------------------|--------------------|
| IFN- $\gamma$ (pg/ml) | 30.0 $\pm$ 2.6 | 21.0 $\pm$ 4.6*  | 9.2 $\pm$ 1.4**#   |
| IL-4 (pg/ml)          | 6.5 $\pm$ 1.6  | 19.6 $\pm$ 2.5** | 67.7 $\pm$ 9.6**## |

Con (normal control group, ambient air inhalation, n=10), ALI 6h (ALI group, smoke inhalation for 6h, n=10), ALI 24h (ALI group, smoke inhalation for 24h, n=10); data are presented as mean  $\pm$  S.E.M. \*P<0.05 and \*\*P<0.01 versus normal control group; #P<0.05 and ##P<0.01 versus ALI 6h group.

[Supplementary Table S2](#).Th1- and Th2-related cytokines in BALF.

| Cytokines             | Con            | ALI 6h           | ALI 24h            |
|-----------------------|----------------|------------------|--------------------|
| IFN- $\gamma$ (pg/ml) | 35.0 $\pm$ 4.6 | 19.3 $\pm$ 3.1** | 10.3 $\pm$ 1.6**#  |
| IL-4 (pg/ml)          | 6.5 $\pm$ 1.6  | 19.6 $\pm$ 2.5** | 67.7 $\pm$ 9.6**## |

Con (normal control group, ambient air inhalation, n=10), ALI 6h (ALI group, smoke inhalation for 6h, n=10), ALI 24h (ALI group, smoke inhalation for 24h, n=10); data are presented as mean  $\pm$  S.E.M. \*P<0.05 and \*\*P<0.01 versus normal control group; #P<0.05 and ##P<0.01 versus ALI 6h group.
